# Supplementary material for: The kinase domain of CK1 enzymes contains the localization cue essential for compartmentalized signaling at the spindle pole
Source: PubMed Central journal article supplement — Mol Biol Cell. 2018 Jul 1;29(13):1664–74. doi: 10.1091/mbc.E18-02-0129 (PMC6080649; doi:10.1091/mbc.e18-02-0129), 2018-07-01
Supplement: mbc-29-1664-s001.pdf [file mbc-29-1664-s001.pdf]

# Supplemental Materials

*Molecular Biology of the Cell*

Elmore et al.

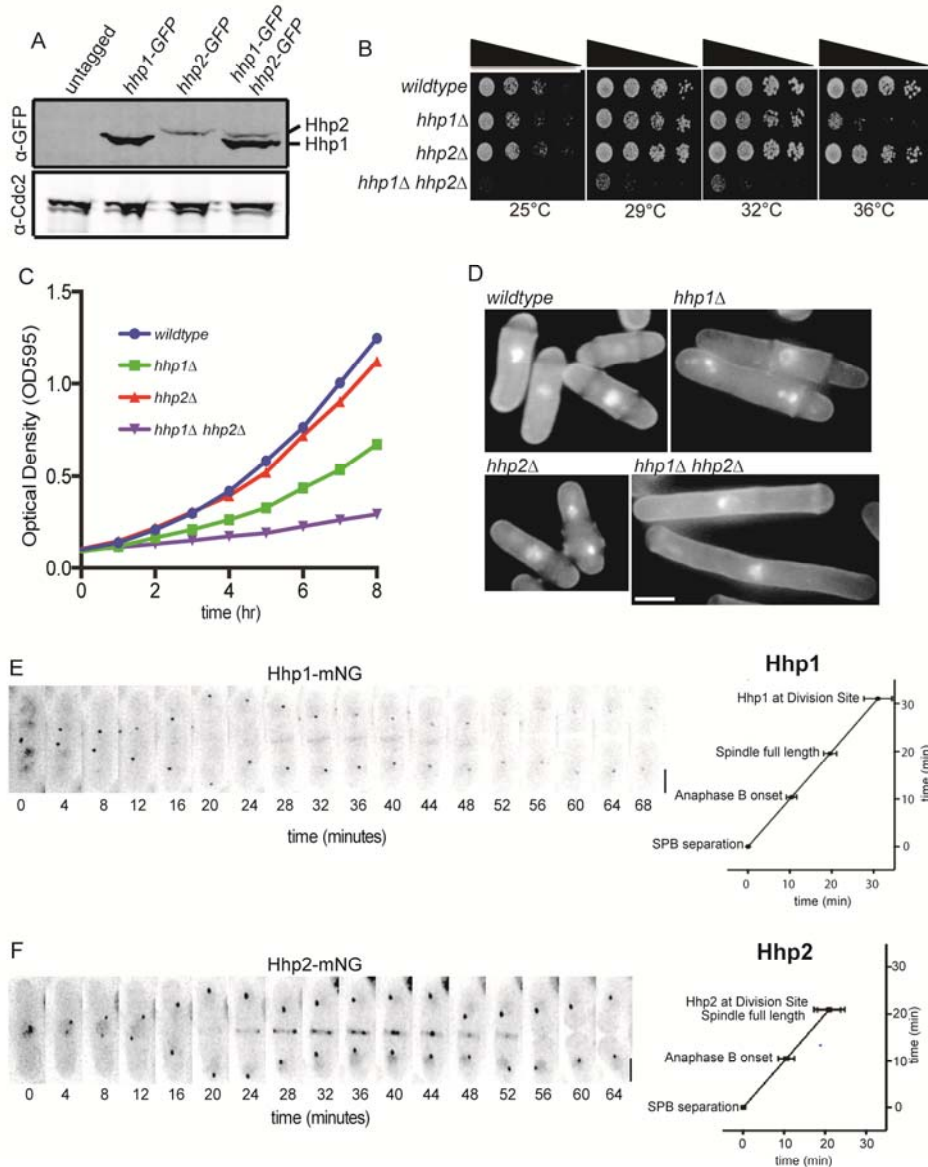

Supplemental Figure 1

**Figure S1. Comparison of Hhp1 and Hhp2 functions and localizations.** (A) Anti-GFP immunoblot of whole-cell extracts prepared from untagged and the indicated GFP-tagged strains. Anti-PSTAIRE antibody served as loading control for lysates. (B) Serial dilutions (10-fold) of the indicated strains were spotted on YE plates and incubated at the indicated temperatures. (C) Liquid growth assay of wildtype, *hhp1Δ*, *hhp2Δ* and *hhp1Δ hhp2Δ* mutants. Cells were grown in liquid

YE at 32°C to log phase and cut back to an  $OD_{595}=0.1$ .  $OD_{595}$  measurements were taken every hour for 8 h to determine growth rates of mutants. (D) *wildtype*, *hhp1* $\Delta$ , *hhp2* $\Delta$ , and *hhp1* $\Delta$  *hhp2* $\Delta$  mutant phenotypes were analyzed by DAPI (DNA) and methyl blue (cell wall) staining. (E and F) (Left panels) Representative montages of Hhp1-mNG (E) and Hhp2-mNG (F) movies. Images are shown in 4 min intervals with T=0 defined as the time of SPB separation. Right panels are timelines showing when Hhp1-mNG and Hhp2-mNG are detected at the division site. The mean time of detection of each protein  $\pm$  SD is plotted from 20 cells each. The onset of anaphase B was determined to be  $10.4 \pm 1.2$  min for *hhp1-mNG* and  $10.5 \pm 1.9$  min for *hhp2-mNG* cells. Hhp1-mNG was detected at the division site at  $31 \pm 3.3$  min and Hhp2-mNG at  $21 \pm 3.8$  min. Scale bars, 5  $\mu$ m.

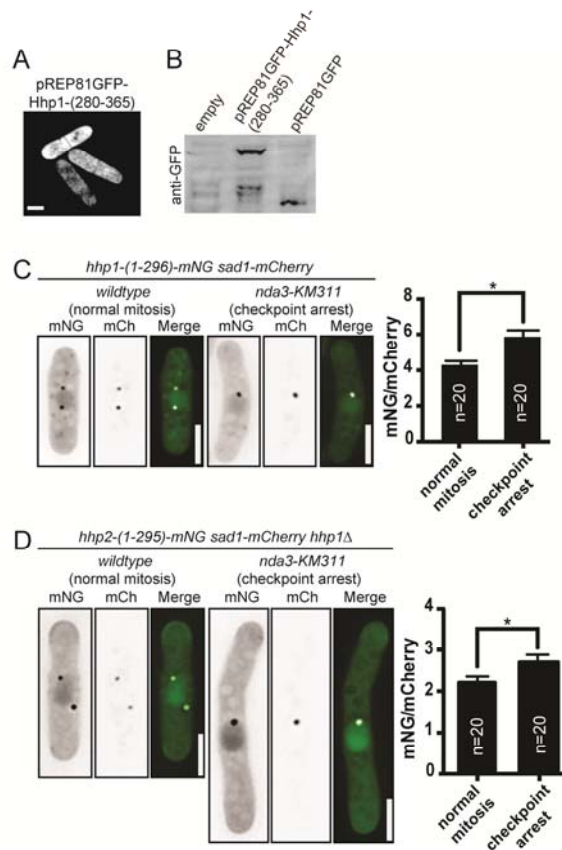

Supplemental Figure 2

**Figure S2. SPB targeting information of Hhp1/2 resides within the kinase domain**(A) Live cell imaging of wildtype cells expressing *pREP81-GFP-hhp1-(280-365)* grown in the absence of thiamine for 20 hours at 32°C. (B) Anti-GFP immunoblot of whole-cell extracts prepared from wildtype cells carrying *pREP81*, *pREP81-GFP*, and *pREP81-GFP-hhp1-(280-365)* grown in the absence of thiamine for 20 h at 32°C. (C and D) Representative images of the indicated

strains. Inverted grayscale images are shown for mNG and mCherry (mCh). Quantitation of Hhp1-(1-296)-mNG and Hhp2-(1-295)-mNG at SPBs is shown on the right represented as mNG/Sad1-mCherry ratios. \* $p < 0.001$  determined using Student's *t*-test. Error bars represent SEM. Scale bars, 5  $\mu$ m.

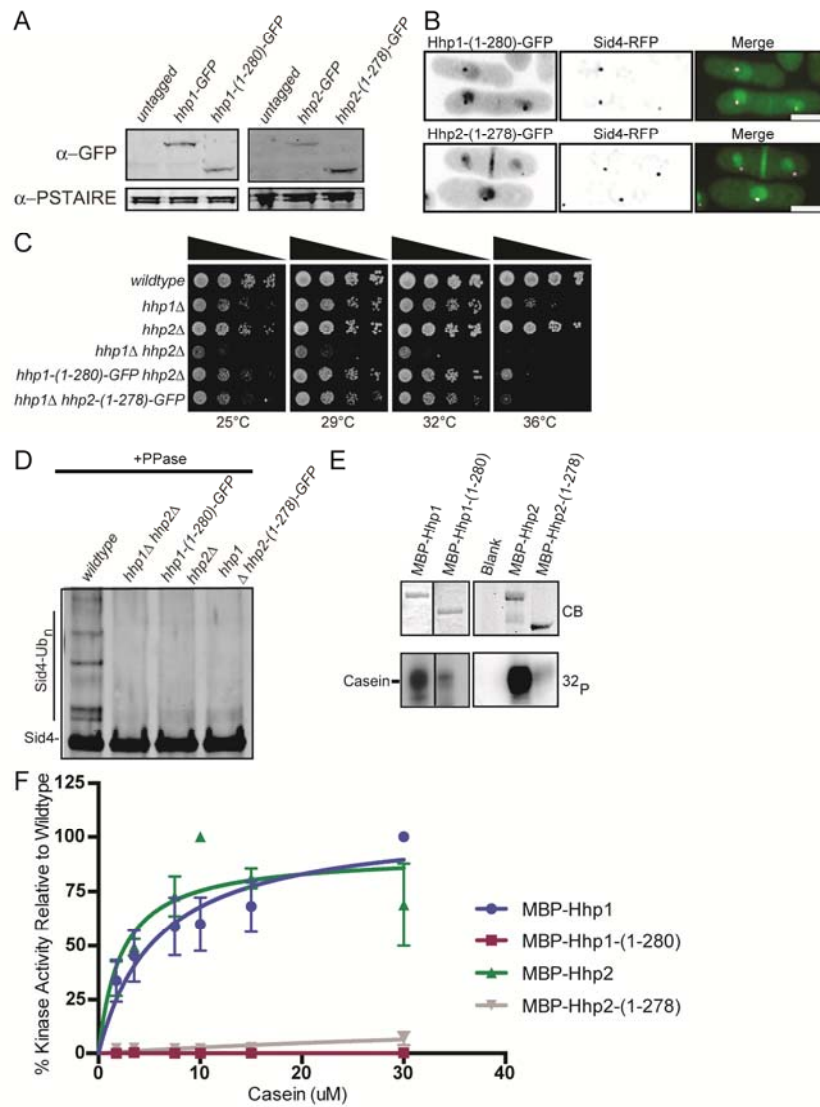

Supplemental Figure 3

**Figure S3. The KDE of Hhp1/2 is required for enzymatic function *in vivo* and *in vitro***(A)Anti-GFP immunoblot of whole-cell extracts prepared from untagged

and the indicated GFP-tagged strains. Anti-PSTAIRES antibody served as loading control for lysates. (B) Live-cell imaging of endogenously tagged Hhp1-(1-280)-GFP and Hhp2-(1-278)-GFP with Sid4-RFP. Bars, 5  $\mu$ m. (C) Serial 10-fold dilutions of the indicated strains were spotted on YE plates and incubated at the indicated temperatures. (D) Sid4 was immunoprecipitated from denatured cell lysates of the indicated strains, treated with phosphatase, and visualized by immunoblotting. (E) *In vitro* phosphorylation of casein by recombinant MBP-Hhp1-(1-280) and MBP-Hhp2-(1-278). Kinases were detected by CB staining of SDS-PAGE gels, and phosphorylated casein was detected by autoradiography ( $^{32}$ P). (F) Recombinant full length Hhp1/2 and the indicated Hhp1/2 truncation mutants were dephosphorylated with  $\lambda$ -phosphatase and used in *in vitro* kinase assays with increasing levels of casein (0-60  $\mu$ M).  $^{32}$ P incorporation of casein was quantified by Phosphorimager.

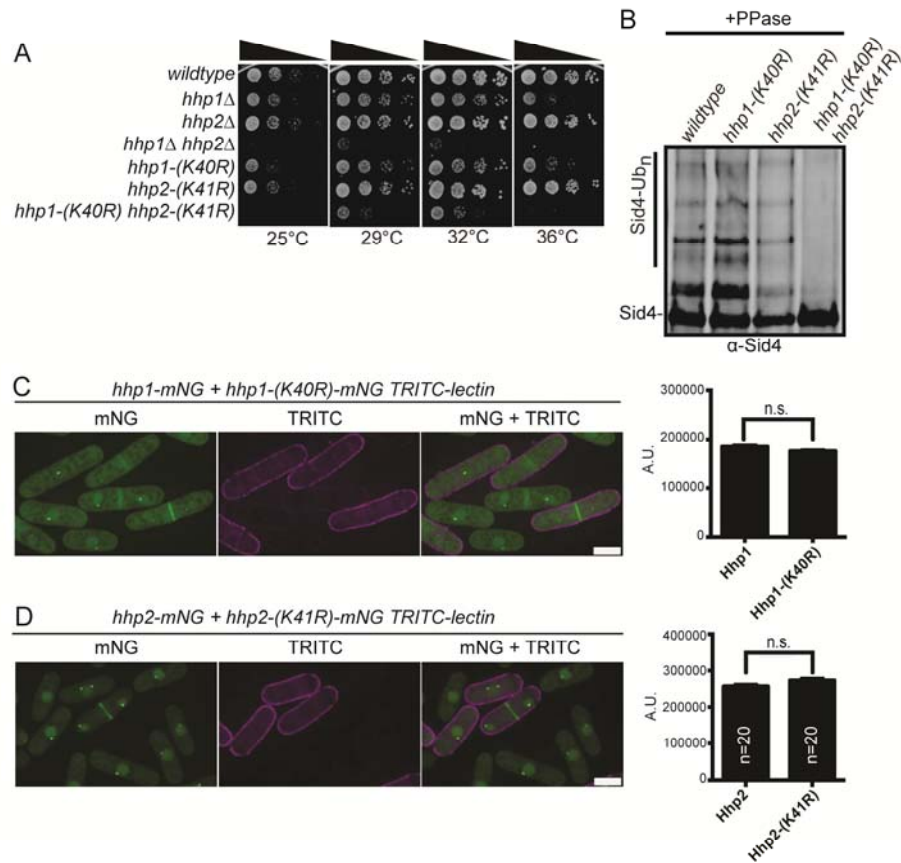

Supplemental Figure 4

**Figure S4.Hhp1/2 kinase-dead mutants localize to the SPB.** (A) Growth assay of *hhp1-(K40R)*, *hhp2-(K41R)*, and *hhp1-(K40R) hhp2-(K41R)* mutants. Serial dilutions (10-fold) of the indicated single and double mutant strains were spotted on YE plates and incubated at the indicated temperatures. (B) Sid4 from the indicated strains was immunoprecipitated from denatured cell lysates, treated with phosphatase, and visualized by immunoblotting. (C and D) *hhp1-(K40R)-*

*mNG*(C) or *hhp2*-(*K41R*)-*mNG* (D) cells were labeled with tetramethylrhodamineisothiocyanate (TRITC)–lectin and mixed with *hhp1*-*mNG* (C) or *hhp2*-*mNG* (D) cells and imaged live. Representative images are shown in the left panels and quantitation of fluorescence intensities are shown on the right. A.U.=arbitrary units. Scale bar, 5  $\mu$ m. p values determined using Student's *t*-test. ns=not significant. Error bars represent SEM.



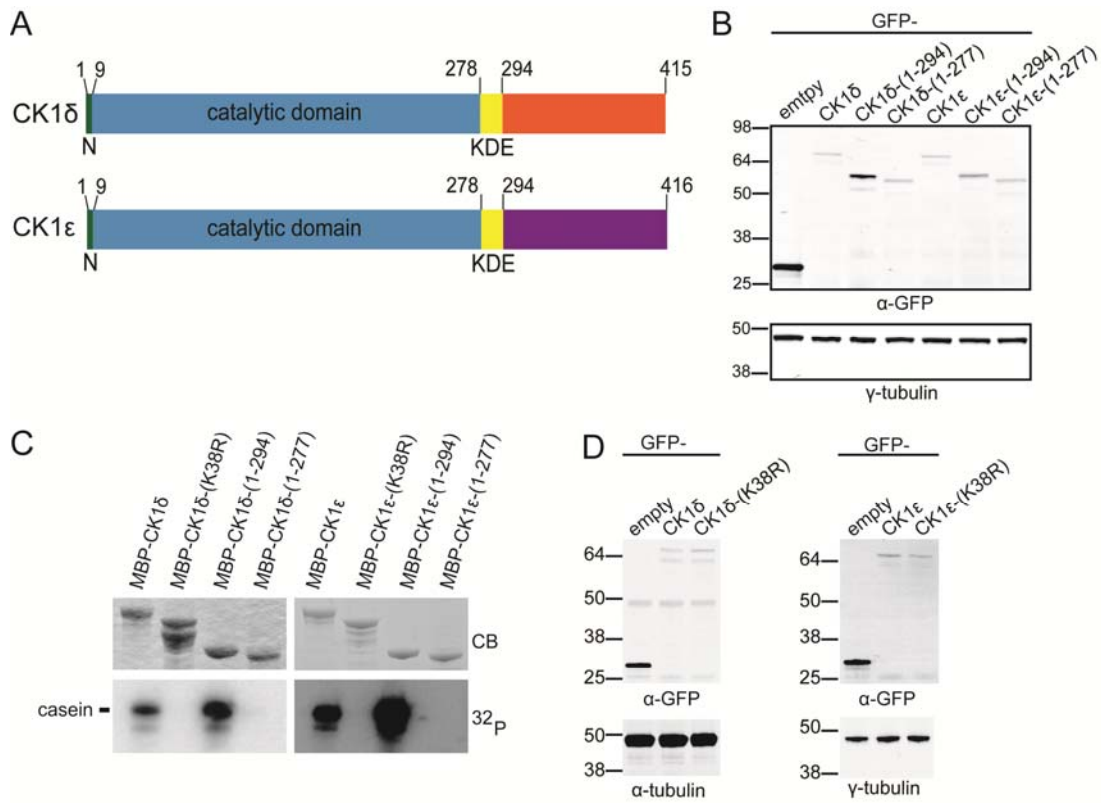

Supplemental Figure 5

**Figure S5. Expression of CK1δ/ε centrosomal localization mutants.** (A) Schematic diagrams of CK1δ/ε with relative positions of N-terminal extension (N)

(green), catalytic domains (blue), kinase domain extensions (yellow) and unrelated C-termini in pink or purple indicated. (B) Anti-GFP immunoblot of whole-cell extracts prepared from the indicated transfected RPE1 cell lines. Anti- $\gamma$ -tubulin antibody served as loading control for lysates. (C) *In vitro* phosphorylation of casein by recombinant MBP-CK1 $\delta/\epsilon$  and the indicated MBP-CK1 $\delta/\epsilon$  mutants. Phosphorylated proteins were detected by CB staining of SDS-PAGE gels, followed by autoradiography ( $^{32}\text{P}$ ). (D) Anti-GFP immunoblot of whole-cell extracts prepared from the indicated transfected RPE1 cell lines. Anti- $\gamma$ -tubulin and anti- $\alpha$ -tubulin antibodies served as loading control for lysates.

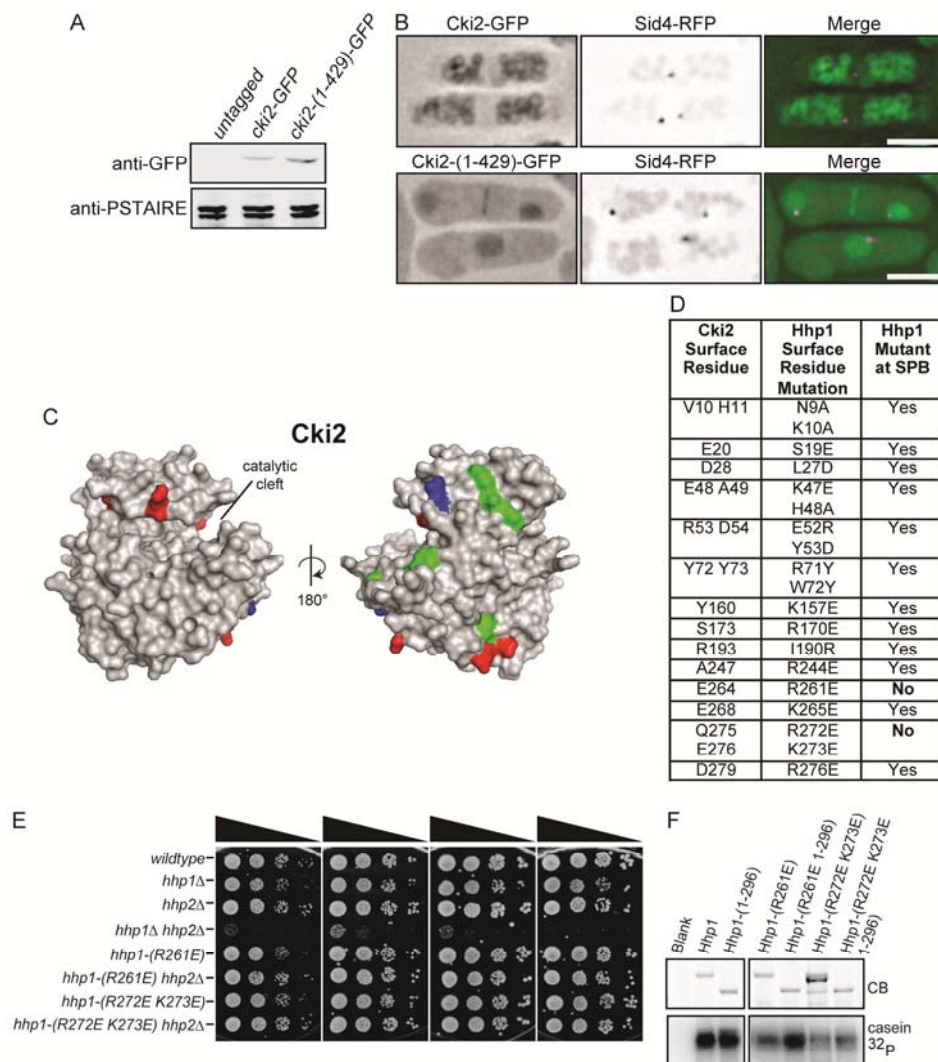

Supplemental Figure 6

**Figure S6. Cki2 does not localize to the SPB.** (A) Anti-GFP immunoblot of whole-cell extracts prepared from untagged and the indicated GFP-tagged strains. Anti-PSTAIRE antibody served as loading control for lysates. (B) Live-cell imaging of endogenously tagged Cki2-GFP and Cki2-(1-429)-GFP with Sid4-RFP. Scale bars, 5μm. (C) Homology model of Cki2 catalytic domain generated from Phyre<sup>2</sup> software and visualized with MacPymol. Surface residues with charge

differences between Cki2 and Hhp1 are colored. Green=hydrophobic residues, Red=acidic residues, Blue=basic residues. (D) Table of Cki2 surface residues with the corresponding mutations made in Hhp1 and the effect of those mutations on SPB localization. (E) Growth assay of *hhp1-(R261E)*, *hhp1-(R261E) hhp2Δ*, *hhp1-(R272E K273E)*, and *hhp1-(R272E K273E) hhp2Δ* mutants. Serial 10-fold dilutions of the indicated single and double mutant strains were spotted on YE plates and incubated at the indicated temperatures. (F) *In vitro* kinase assays of recombinant MBP-Hhp1, MBP-Hhp1-(1-296), MBP-Hhp1-(R261E), MBP-Hhp1-(R261E 1-296), MBP-Hhp1-(R272E K273E) and MBP-Hhp1-(R272E K273E 1-296), detected by CB staining of SDS-PAGE gels, with casein as substrate. Phosphorylated casein was detected by autoradiography (<sup>32</sup>P).

**A** *sid4-SA1 hhp2-GFP*  
(25°C)

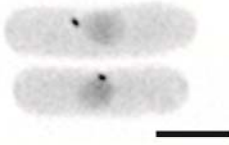

*sid4-SA1 hhp2-GFP*  
(36°C)

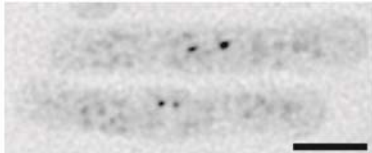

**B** *ppc89Δ pJK48-nmt81-ppc89*  
*hhp2-GFP*  
-thiamine

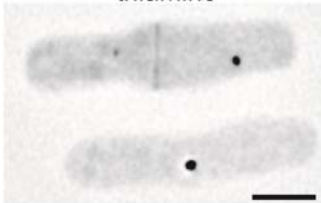

+thiamine

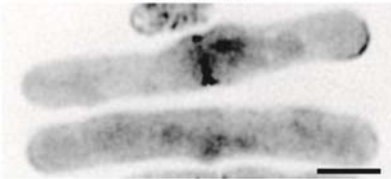

**Figure S7. Hhp2 requires Ppc89 to localize to the SPB.** (A) Localization of Hhp2-GFP in a *sid4-SA1* temperature sensitive strain at the permissive (25°C) and restrictive (36°C) temperatures. (B) Localization of Hhp2-GFP in a *ppc89* shut-off strain (-thiamine, *ppc89* expression on; +thiamine, *ppc89* expression off). Scale bars, 5 μm.

**Table S1. Strains used in this study.**

| <b>Strain</b>   | <b>Genotype</b>                                                                                                      | <b>Source</b>      |
|-----------------|----------------------------------------------------------------------------------------------------------------------|--------------------|
| <b>Figure 1</b> |                                                                                                                      |                    |
| KGY17313        | <i>hhp1-mNG:kan<sup>R</sup> sid4-RFP:kan<sup>R</sup> ade6-M210 leu1-32 ura4-D18 h-</i>                               | This study         |
| KGY16868        | <i>hhp2-mNG:kan<sup>R</sup> sid4-RFP:kan<sup>R</sup> ade6-M210 leu1-32 ura4-D18 h+</i>                               | This study         |
| KGY17899        | <i>hhp1-mNG:kan<sup>R</sup> sad1-mCherry:kan<sup>R</sup> ade6-M210 leu1-32 ura4-D18 h+</i>                           | This study         |
| KGY17900        | <i>hhp1-mNG:kan<sup>R</sup> sad1-mCherry:kan<sup>R</sup> nda3-km311 ade6-M210 leu1-32 ura4-D18 h+</i>                | This study         |
| KGY18725        | <i>hhp2-mNG:kan<sup>R</sup> sad1-mCherry:kan<sup>R</sup> ade6-M210 leu1-32 ura4-D18 h+</i>                           | This study         |
| KGY18726        | <i>hhp2-mNG:kan<sup>R</sup> sad1-mCherry:kan<sup>R</sup> nda3-km311 ade6-M210 leu1-32 ura4-D18 h+</i>                | This study         |
| KGY19353        | <i>hhp2-mNG:kan<sup>R</sup> sad1-mCherry:kan<sup>R</sup> hhp1::ura4<sup>+</sup> ade6-M210 leu1-32 h+</i>             | This study         |
| <b>Figure 2</b> |                                                                                                                      |                    |
| KGY246          | <i>ade6-M210 leu1-32 ura4-D18 h-</i>                                                                                 | Lab stock          |
| KGY14697        | <i>hhp1-GFP:kan<sup>R</sup> ade6-M210 leu1-32 ura4-D18 h-</i>                                                        | Lab stock          |
| KGY15972        | <i>hhp1-(1-296)-GFP:kan<sup>R</sup> ade6-M210 leu1-32 ura4-D18 h-</i>                                                | This study         |
| KGY12838        | <i>hhp2-GFP:kan<sup>R</sup> ade6-M210 leu1-32 ura4-D18 h-</i>                                                        | Lab stock          |
| KGY16977        | <i>hhp2-(1-295)-GFP:kan<sup>R</sup> ade6-M210 leu1-32 ura4-D18 h+</i>                                                | This study         |
| KGY19140        | <i>hhp1-(1-296)-GFP:kan<sup>R</sup> sid4-RFP:kan<sup>R</sup> ade6-M210 leu1-32 ura4-D18 h-</i>                       | This study         |
| KGY18815        | <i>hhp2-(1-295)-GFP:kan<sup>R</sup> sid4-RFP:kan<sup>R</sup> leu1-32 ura4-D18 h-</i>                                 | This study         |
| KGY6415         | <i>hhp1::ura4<sup>+</sup> leu1-32 h-</i>                                                                             | Bimbo et al., 2005 |
| KGY7081         | <i>hhp2::ura4<sup>+</sup> leu1-32 h-</i>                                                                             | Bimbo et al., 2005 |
| KGY13958        | <i>hhp1::ura4<sup>+</sup> hhp2::kan<sup>R</sup> leu1-32 h+</i>                                                       | This study         |
| KGY16775        | <i>hhp1-(1-296)-GFP:kan<sup>R</sup> hhp2::ura4<sup>+</sup> ade6-M210 leu1-32 h-</i>                                  | This study         |
| KGY17078        | <i>hhp1::ura4<sup>+</sup> hhp2-(1-295)-GFP:kan<sup>R</sup> ade6-M210 leu1-32 h+</i>                                  | This study         |
| <b>Figure3</b>  |                                                                                                                      |                    |
| KGY16776        | <i>hhp1-(K40R)-GFP:kan<sup>R</sup> ade6-M210 leu1-32 ura4-D18 h-</i>                                                 | This study         |
| KGY17628        | <i>hhp2-(K41R)-GFP:kan<sup>R</sup> ade6-M210 leu1-32 ura4-D18 h-</i>                                                 | This study         |
| KGY19354        | <i>hhp1-(K40R)-mNG:kan<sup>R</sup> sid4-RFP:kan<sup>R</sup> ade6-M210 leu1-32 ura4-D18 h+</i>                        | This study         |
| KGY19444        | <i>hhp1-(K40R)-mNG:kan<sup>R</sup> hhp2::ura4<sup>+</sup> sid4-RFP:kan<sup>R</sup> ade6-M210 leu1-32 ura4-D18 h-</i> | This study         |
| KGY19445        | <i>hhp2-(K41R)-mNG:kan<sup>R</sup> hhp1::ura4<sup>+</sup> sid4-RFP:kan<sup>R</sup> ade6-M210 leu1-32 ura4-D18h?</i>  | This study         |
| <b>Figure5</b>  |                                                                                                                      |                    |
| KGY17627        | <i>hhp1-(R261E)-mNG:kan<sup>R</sup> sid4-RFP:kan<sup>R</sup> leu1-32 ura4-D18 h-</i>                                 | This study         |
| KGY17628        | <i>hhp1-(R272E K273E)-mNG:kan<sup>R</sup> sid4-RFP:kan<sup>R</sup> leu1-32 ura4-D18 h-</i>                           | This study         |
| KGY14522        | <i>hhp1-(R261E)-GFP:kan<sup>R</sup> leu1-32 ura4-D18 h-</i>                                                          | This study         |
| KGY14523        | <i>hhp1-(R272E K273E)-GFP:kan<sup>R</sup> leu1-32 ura4-D18h-</i>                                                     | This study         |
| <b>Figure 6</b> |                                                                                                                      |                    |
| KGY1296         | <i>PJ69-4A MATa trp1-190 leu2-3,112 ura3-52 his3-200 gal4Δ gal80Δ LYS2::GAL1-HIS3 GAL2-ADE2 met2::GAL-lacZ</i>       | Lab stock          |
| <b>Figure 7</b> |                                                                                                                      |                    |
| KGY246          | <i>ade6-M210 ura4-D18 leu1-32 h-</i>                                                                                 | Lab stock          |
| KGY5663         | <i>nda3-km311 ade6-M21x ura4-D18 leu1-32 h+</i>                                                                      | Lab stock          |
| KGY13805        | <i>nda3-KM311 dma1::ura4+ ade6-M21x leu1-32 ura4-D18 h+</i>                                                          | Lab stock          |
| KGY14395        | <i>nda3-KM311 hhp2::kan<sup>R</sup> ade6-M210 leu1-32 ura4-D18 h-</i>                                                | This study         |
| KGY19352        | <i>hhp1-(R272E K273E)::kan<sup>R</sup> nda3-km311 ade6-M210 leu1-32 ura4-D18 h-</i>                                  | This study         |

|                  |                                                                                                                                                              |            |
|------------------|--------------------------------------------------------------------------------------------------------------------------------------------------------------|------------|
| KGY18331         | <i>hhp1</i> -(R272E K273E)::kan <sup>R</sup> <i>hhp2</i> ::ura4 <sup>+</sup> <i>nda3</i> -KM311 <i>ade6</i> -M210<br><i>ura4</i> -D18 <i>leu1</i> -32 h-     | This study |
| KGY3104-2        | <i>hhp1</i> -(R261E)::kan <sup>R</sup> <i>nda3</i> -KM311 <i>ade6</i> -M210 <i>ura4</i> -D18 <i>leu1</i> -32 h-                                              | This study |
| KGY3105-2        | <i>hhp1</i> -(R261E)::kan <sup>R</sup> <i>hhp2</i> ::ura4 <sup>+</sup> <i>nda3</i> -KM311 <i>ade6</i> -M210 <i>ura4</i> -D18<br><i>leu1</i> -32 h-           | This study |
| KGY14525         | <i>hhp1</i> -(R272E K273E)-GFP::kan <sup>R</sup> <i>hhp2</i> ::ura4 <sup>+</sup> <i>ura4</i> -D18 <i>leu1</i> -32 h+                                         | This study |
| KGY14526         | <i>hhp1</i> -(R261E)-GFP::kan <sup>R</sup> <i>hhp2</i> ::ura4 <sup>+</sup> <i>ade6</i> -M210 <i>ura4</i> -D18 <i>leu1</i> -32<br>h+                          | This study |
| <b>Figure S1</b> |                                                                                                                                                              |            |
| KGY16343         | <i>hhp1</i> -GFP:kan <sup>R</sup> <i>hhp2</i> -GFP:kan <sup>R</sup> <i>ade6</i> -M210 <i>leu1</i> -32 <i>ura4</i> -D18h+                                     | This study |
| KGY16788         | <i>hhp1</i> -mNG:kan <sup>R</sup> <i>ade6</i> -M210 <i>leu1</i> -32 <i>ura4</i> -D18 h-                                                                      | This study |
| KGY16831         | <i>hhp2</i> -mNG:kan <sup>R</sup> <i>ade6</i> -M210 <i>leu1</i> -32 <i>ura4</i> -D18 h-                                                                      | This study |
| <b>Figure S2</b> |                                                                                                                                                              |            |
| KGY17901         | <i>hhp1</i> -(1-296)-mNG:kan <sup>R</sup> <i>sad1</i> -mCherry:kan <sup>R</sup> <i>ade6</i> -M210 <i>leu1</i> -32 <i>ura4</i> -<br>D18 h-                    | This study |
| KGY17902         | <i>hhp1</i> -(1-296)-mNG:kan <sup>R</sup> <i>sad1</i> -mCherry:kan <sup>R</sup> <i>ade6</i> -M210 <i>leu1</i> -32 <i>ura4</i> -<br>D18 <i>nda3</i> -km311 h- | This study |
| <b>Figure S3</b> |                                                                                                                                                              |            |
| KGY15971         | <i>hhp1</i> -(1-280)-GFP:kan <sup>R</sup> <i>ade6</i> -M210 <i>leu1</i> -32 <i>ura4</i> -D18 h-                                                              | This study |
| KGY16143         | <i>hhp2</i> -(1-278)-GFP:kan <sup>R</sup> <i>ade6</i> -M210 <i>leu1</i> -32 <i>ura4</i> -D18 h-                                                              | This study |
| KGY19157         | <i>hhp1</i> -(1-280)-GFP:kan <sup>R</sup> <i>sid4</i> -RFP:kan <sup>R</sup> <i>ade6</i> -M210 <i>leu1</i> -32 <i>ura4</i> -D18<br>h+                         | This study |
| KGY17079         | <i>hhp1</i> -(1-280)-GFP:kan <sup>R</sup> <i>hhp2</i> ::ura4 <sup>+</sup> <i>ade6</i> -M210 <i>leu1</i> -32 <i>ura4</i> -D18 h-                              | This study |
| KGY16869         | <i>hhp2</i> -(1-278)-GFP:kan <sup>R</sup> <i>hhp1</i> ::ura4 <sup>+</sup> <i>ade6</i> -M210 <i>leu1</i> -32 <i>ura4</i> -D18 h-                              | This study |
| <b>Figure S4</b> |                                                                                                                                                              |            |
| KGY19337         | <i>hhp1</i> -(K40R):kan <sup>R</sup> <i>leu1</i> -32 <i>ura4</i> -D18 h-                                                                                     | This study |
| KGY19349         | <i>hhp2</i> -(K41R):kan <sup>R</sup> <i>ade6</i> -M210 <i>leu1</i> -32 <i>ura4</i> -D18 h+                                                                   | This study |
| KGY19342         | <i>hhp1</i> -(K40R):kan <sup>R</sup> <i>hhp2</i> -(K41R):kan <sup>R</sup> <i>ade6</i> -M210 <i>leu1</i> -32 <i>ura4</i> -D18 h+                              | This study |
| <b>Figure S6</b> |                                                                                                                                                              |            |
| KGY17283         | <i>cki2</i> -GFP:kan <sup>R</sup> <i>ade6</i> -M210 <i>leu1</i> -32 <i>ura4</i> -D18 h-                                                                      | This study |
| KGY17461         | <i>cki2</i> -(1-429)-GFP:kan <sup>R</sup> <i>ade6</i> -M210 <i>leu1</i> -32 <i>ura4</i> -D18 h-                                                              | This study |
| KGY19323         | <i>cki2</i> -GFP:kan <sup>R</sup> <i>sid4</i> -RFP:kan <sup>R</sup> <i>ade6</i> -M210 <i>leu1</i> -32 <i>ura4</i> -D18h-                                     | This study |
| KGY19324         | <i>cki2</i> -(1-429)-GFP:kan <sup>R</sup> <i>sid4</i> -RFP:kan <sup>R</sup> <i>ade6</i> -M210 <i>leu1</i> -32 <i>ura4</i> -D18h-                             | This study |
| KGY19159         | <i>hhp1</i> -(R261E):kan <sup>R</sup> <i>ade6</i> -M210 <i>leu1</i> -32 <i>ura4</i> -D18 h-                                                                  | This study |
| KGY18807         | <i>hhp1</i> -(R261E):kan <sup>R</sup> <i>hhp2</i> ::ura4 <sup>+</sup> <i>leu1</i> -32 <i>ura4</i> -D18 h?                                                    | This study |
| KGY19344         | <i>hhp1</i> -(R272E K273E):kan <sup>R</sup> <i>ade6</i> -M210 <i>leu1</i> -32 <i>ura4</i> -D18 h-                                                            | This study |
| KGY19443         | <i>hhp1</i> -(R272E K273E):kan <sup>R</sup> <i>hhp2</i> ::ura4 <sup>+</sup> <i>ade6</i> -M210 <i>leu1</i> -32 <i>ura4</i> -D18<br>h+                         | This study |
| <b>Figure S7</b> |                                                                                                                                                              |            |
| KGY14155         | <i>hhp2</i> -GFP:kan <sup>R</sup> <i>sid4</i> -SA1 <i>ade6</i> -M210 <i>leu1</i> -32 <i>ura4</i> -D18h+                                                      | This study |
| KGY19398         | <i>hhp2</i> -GFP:kan <sup>R</sup> <i>leu1</i> ::pJK148-nmt81-ppc89 <i>ppc89</i> ::ura4 <sup>+</sup> <i>ade6</i> -<br>M210h+                                  | This study |
